# Supplementary material
Source: PubMed Central journal article supplement (PMC6769381)
Supplement: EMBJ-38-e101597-s001.pdf [file EMBJ-38-e101597-s001.pdf]

**Appendix**

Appendix Table S1.....Page 1

Appendix Table S2.....Page 2

Appendix Table S3.....Page 4

Appendix Table S4.....Page 5

Appendix Table S5.....Page 7

| Terms from the Process Ontology |                   |                      |                             |
|---------------------------------|-------------------|----------------------|-----------------------------|
| Gene Ontology term              | Cluster frequency | Background frequency | Genes annotated to the term |
| None                            |                   |                      |                             |

| Terms from the Function Ontology                                                       |                            |                              |                             |
|----------------------------------------------------------------------------------------|----------------------------|------------------------------|-----------------------------|
| Gene Ontology term                                                                     | Cluster frequency          | Background frequency         | Genes annotated to the term |
| NAD binding                                                                            | 2 out of 9 genes<br>22.2%  | 27 out of 6473 genes<br>0.4% | C210070W_A, C503770C_A      |
| Oxidoreductase activity, acting on the CH-OH group of donors, NAD, or NADP as acceptor | 2 out of 19 genes<br>26.3% | 69 out of 6473 genes<br>1.1% | C210070W_A, C503770C_A      |
| Oxidoreductase activity, acting on the CH-OH group of donors                           | 2 out of 9 genes<br>22.2%  | 73 out of 6473 genes<br>1.1% | C210070W_A, C503770C_A      |

| Terms from the Component Ontology |                   |                      |                             |
|-----------------------------------|-------------------|----------------------|-----------------------------|
| Gene Ontology term                | Cluster frequency | Background frequency | Genes annotated to the term |
| None                              |                   |                      |                             |

**Appendix Table S1.** Results of gene ontology (GO) term enrichment analysis of differentially expressed genes between diploid and tetraploid cells on PRE-SPO medium at 3 h. Background frequency represents the total number of genes annotated to each GO term in the *C. albicans* genome divided by the total number of genes in the genome. All included terms are significantly enriched ( $p < 0.05$ ).

| Terms from the Process Ontology |                            |                              |                             |
|---------------------------------|----------------------------|------------------------------|-----------------------------|
| Gene Ontology term              | Cluster frequency          | Background frequency         | Genes annotated to the term |
| Acetate catabolic process       | 2 out of 19 genes<br>10.5% | 8 out of 6473 genes<br>0.1%  | <i>CTN1, ICL1</i>           |
| Regulation of flocculation      | 2 out of 19 genes<br>10.5% | 9 out of 6473 genes<br>0.1%  | <i>ALS1, PGA13</i>          |
| Acetate metabolic process       | 2 out of 19 genes<br>10.5% | 13 out of 6473 genes<br>0.1% | <i>CTN1, ICL1</i>           |

| Terms from the Function Ontology   |                            |                               |                                        |
|------------------------------------|----------------------------|-------------------------------|----------------------------------------|
| Gene Ontology term                 | Cluster frequency          | Background frequency          | Genes annotated to the term            |
| Structural constituent of ribosome | 5 out of 19 genes<br>26.3% | 162 out of 6473 genes<br>2.5% | <i>RDN18, RDN25, RDN5, RDN58, RRNS</i> |
| Structural molecule activity       | 5 out of 19 genes<br>26.3% | 261 out of 6473 genes<br>4.0% | <i>RDN18, RDN25, RDN5, RDN58, RRNS</i> |

| Terms from the Component Ontology |                            |                               |                                        |
|-----------------------------------|----------------------------|-------------------------------|----------------------------------------|
| Gene Ontology term                | Cluster frequency          | Background frequency          | Genes annotated to the term            |
| Ribosomal subunit                 | 5 out of 19 genes<br>26.3% | 171 out of 6473 genes<br>2.6% | <i>RDN18, RDN25, RDN5, RDN58, RRNS</i> |
| Cytosolic ribosome                | 4 out of 19 genes<br>21.1% | 101 out of 6473 genes<br>1.6% | <i>RDN18, RDN25, RDN5, RDN58</i>       |
| Ribosome                          | 5 out of 19 genes<br>26.3% | 225 out of 6473 genes<br>3.5% | <i>RDN18, RDN25, RDN5, RDN58, RRNS</i> |
| Cytosolic large ribosomal subunit | 3 out of 19 genes<br>15.8% | 58 out of 6473 genes<br>0.9%  | <i>RDN25, RDN5, RDN58</i>              |
| Cytosolic part                    | 4 out of 19 genes<br>21.1% | 154 out of 6473 genes<br>2.4% | <i>RDN18, RDN25, RDN5, RDN58</i>       |
| Cell wall                         | 4 out of 19 genes<br>21.1% | 163 out of 6473 genes<br>2.5% | <i>ALS1, HWP1, PGA13, PGA31</i>        |
| Fungal-type cell wall             | 4 out of 19 genes<br>21.1% | 163 out of 6473 genes<br>2.5% | <i>ALS1, HWP1, PGA13, PGA31</i>        |
| External encapsulating structure  | 4 out of 19 genes<br>21.1% | 164 out of 6473 genes<br>2.5% | <i>ALS1, HWP1, PGA13, PGA31</i>        |
| Cell surface                      | 4 out of 19 genes<br>21.1% | 203 out of 6473 genes<br>3.1% | <i>ALS1, HWP1, PGA13, PGA31</i>        |

**Appendix Table S2.** Results of gene ontology (GO) term enrichment analysis of differentially expressed genes between diploid and tetraploid cells on PRE-SPO medium at 6 h. Background frequency represents the total number of genes annotated to each GO term in the *C. albicans*

genome divided by the total number of genes in the genome. All included terms are significantly enriched ( $p < 0.05$ ).

| Terms from the Process Ontology |                   |                      |                             |
|---------------------------------|-------------------|----------------------|-----------------------------|
| Gene Ontology term              | Cluster frequency | Background frequency | Genes annotated to the term |
| None                            |                   |                      |                             |

  

| Terms from the Function Ontology |                   |                      |                             |
|----------------------------------|-------------------|----------------------|-----------------------------|
| Gene Ontology term               | Cluster frequency | Background frequency | Genes annotated to the term |
| None                             |                   |                      |                             |

  

| Terms from the Component Ontology |                            |                               |                                                 |
|-----------------------------------|----------------------------|-------------------------------|-------------------------------------------------|
| Gene Ontology term                | Cluster frequency          | Background frequency          | Genes annotated to the term                     |
| Chromosomal part                  | 7 out of 27 genes<br>25.9% | 384 out of 6473 genes<br>5.9% | <i>CDC6, HCM1, HHT2, MCD1, OGG1, PRI2, TOS4</i> |
| Chromosome                        | 7 out of 27 genes<br>25.9% | 404 out of 6473 genes<br>6.2% | <i>CDC6, HCM1, HHT2, MCD1, OGG1, PRI2, TOS4</i> |
| Nuclear chromosome part           | 6 out of 27 genes<br>22.2% | 311 out of 6473 genes<br>4.8% | <i>CDC6, HCM1, HHT2, MCD1, PRI2, TOS4</i>       |
| Protein-DNA complex               | 3 out of 27 genes<br>11.1% | 56 out of 6473 genes<br>0.9%  | <i>CDC6, HHT2, PRI2</i>                         |

**Appendix Table S3.** Results of gene ontology (GO) term enrichment analysis of differentially expressed genes between diploid and tetraploid cells on PRE-SPO medium at 12 h. Background frequency represents the total number of genes annotated to each GO term in the *C. albicans* genome divided by the total number of genes in the genome. All included terms are significantly enriched ( $p < 0.05$ ).

| Terms from the Process Ontology           |                             |                               |                                                                                                 |
|-------------------------------------------|-----------------------------|-------------------------------|-------------------------------------------------------------------------------------------------|
| Gene Ontology term                        | Cluster frequency           | Background frequency          | Genes annotated to the term                                                                     |
| Negative regulation of hydrolase activity | 6 out of 1173 genes<br>3.5% | 19 out of 6473 genes<br>0.3%  | <i>C1_14190C_A, CDC46, CDC54, HSP30, MCM2, MCM3</i>                                             |
| Negative regulation of helicase activity  | 4 out of 173 genes<br>2.3%  | 6 out of 6473 genes<br>0.1%   | <i>CDC46, CDC54, MCM2, MCM3</i>                                                                 |
| Regulation of helicase activity           | 4 out of 173 genes<br>2.3%  | 8 out of 6473 genes<br>0.1%   | <i>CDC46, CDC54, MCM2, MCM3</i>                                                                 |
| DNA replication                           | 12 out of 19 genes<br>6.9%  | 115 out of 6473 genes<br>1.8% | <i>C1_01130W_A, C1_07490C_A, CDC46, CDC54, DUN1, DUT1, MCM2, MCM3, PRI2, RFA1, RNR1, YBL053</i> |

| Terms from the Function Ontology                                  |                             |                               |                                                                                                   |
|-------------------------------------------------------------------|-----------------------------|-------------------------------|---------------------------------------------------------------------------------------------------|
| Gene Ontology term                                                | Cluster frequency           | Background frequency          | Genes annotated to the term                                                                       |
| Single-stranded DNA-dependent ATP-dependent DNA helicase activity | 4 out of 173 genes<br>2.3%  | 7 out of 6473 genes<br>0.1%   | <i>CDC46, CDC54, MCM2, MCM3</i>                                                                   |
| Single-stranded DNA-dependent ATPase activity                     | 4 out of 173 genes<br>2.3%  | 11 out of 6473 genes<br>0.2%  | <i>CDC46, CDC54, MCM2, MCM3</i>                                                                   |
| Double-stranded DNA binding                                       | 13 out of 173 genes<br>7.5% | 157 out of 6473 genes<br>2.4% | <i>CDC46, CDC54, CR_02510W_A, CSR1, MCM2, MCM3, NRG1, RFA2, RME1, STP2, UGA3, WOR4, YBL053</i>    |
| Sequence-specific DNA binding                                     | 14 out of 173 genes<br>8.1% | 184 out of 6473 genes<br>2.8% | <i>AHR1, CDC46, CDC54, CR02510W_A, CSR1, CUP9, MCM2, MCM3, NRG1, RFA2, RME1, STP2, UGA3, WOR4</i> |
| Sequence-specific double-stranded DNA binding                     | 10 out of 173 genes<br>5.8% | 110 out of 6473 genes<br>1.7% | <i>CDC46, CDC54, CR02510W_A, CSR1, MCM2, MCM3, RME1, STP2, UGA3, WOR4</i>                         |

| Terms from the Component Ontology   |                            |                              |                                                                  |
|-------------------------------------|----------------------------|------------------------------|------------------------------------------------------------------|
| Gene Ontology term                  | Cluster frequency          | Background frequency         | Genes annotated to the term                                      |
| MCM complex                         | 4 out of 173 genes<br>2.3% | 6 out of 6473 genes<br>0.1%  | <i>CDC46, CDC54, MCM2, MCM3</i>                                  |
| Nuclear replication fork            | 8 out of 173 genes<br>4.6% | 42 out of 6473 genes<br>0.6% | <i>C1_07490C_A, CDC46, CDC54, MCM2, MCM3, PRI2, RFA2, YBL053</i> |
| Replication fork                    | 8 out of 173 genes<br>4.6% | 52 out of 6473 genes<br>0.8% | <i>C1_07490C_A, CDC46, CDC54, MCM2, MCM3, PRI2, RFA2, YBL053</i> |
| CMG complex                         | 4 out of 173 genes<br>2.3% | 11 out of 6473 genes<br>0.2% | <i>CDC46, CDC54, MCM2, MCM3</i>                                  |
| Replication fork protection complex | 5 out of 173 genes<br>2.9% | 24 out of 6473 genes<br>0.4% | <i>CDC46, CDC54, MCM2, MCM3, YBL053</i>                          |
| Protein-DNA complex                 | 7 out of 173 genes<br>4.0% | 56 out of 6473 genes<br>0.9% | <i>C1_07490C_A, CDC46, CDC54, MCM2, MCM3, PRI2, RFA2</i>         |

**Appendix Table S4.** Results of gene ontology (GO) term enrichment analysis of differentially expressed genes between diploid and tetraploid cells on PRE-SPO medium at 24 h. Background frequency represents the total number of genes annotated to each GO term in the *C. albicans*

genome divided by the total number of genes in the genome. All included terms are significantly enriched ( $p < 0.05$ ).

| Oligo Number | Oligo Name               | Oligo Sequence                                                                                                   |
|--------------|--------------------------|------------------------------------------------------------------------------------------------------------------|
| 4564         | Cap1-Neon long oligo for | GCTAAATGTTCTGAAAAGGGAGTAGTGATA<br>AATACTGCTGATGTGAATCAATTACTAGAGC<br>GAAGTATAAAACATGGTGGTAGTGGTATGG<br>TTTCTAAAG |
| 4565         | Cap1-Neon long oligo rev | CCAAATATAAATATAAATACAAAAAATAAA<br>GCCAAATAGATGTCAATTGAAATACCGTAAA<br>ATAAATTAACCCCGCTCTAGAAGTAGTGGAT             |
| 5547         | SOD1_TetOff_For          | TTAGTACACGACCTTAATTTGTCACATACATG<br>CTTTACTTTCTCCGATCCAACGGGGATTTCATT<br>ATTATTATTTGCTTATGggaaacagctatgaccatg    |
| 5548         | SOD1_TetOff_Rev          | AGATTATAAATTGTTTCTTTTTCTATTATTTTGC<br>AACCATTAAGATACAATTGCATTGAATTACAT<br>ACCAGCTTTAACCATcgactatttatattgtatg     |
| 4823         | SOD2_TetOff_For          | GATAGCGCTACATATAGATTAATCACCAGTTT<br>ATGATAGTAAACACATGAAAAAGTTACACAT<br>ATAATTGCTTACAAATGggaaacagctatgaccatg      |
| 4824         | SOD2_TetOff_Rev          | GCAGCGGCGTTCAAAGTAGCACGGGTAGTTG<br>CGGAAGAAGCCTTTAATAAAACACGAGATGA<br>TGATCTGATAGAAAACATcgactatttatattgtatg      |
| 4702         | SOD3_TetOff_For          | ATCAATCACACATTTCCAGTATGCATTTCCCA<br>GAGGAAAAGCGTTCAAGTCGCTTGCTATAAT<br>GAGTTGCGGAAATGggaaacagctatgaccatg         |
| 4703         | SOD3_TetOff_Rev          | GCTTTTATACCCAGAGAGTGCTGTGAGGTTAT<br>GTATACTCCCTACGCAAATTAACCTTTGTACT<br>ATTGTGGTTATCCATcgactatttatattgtatg       |
| 4813         | TRX1_TetOff_For          | AAAAGATAAGCAAGATAATTGATGATGATGA<br>ATAATAAATGTTGATTTCTCAGCAACGATCTA<br>CTGCCGCGGCGCCAATGggaaacagctatgaccatg      |
| 4814         | TRX1_TetOff_Rev          | GCAAAAAAGTCAACAATAACTAAGTTGTTTTT<br>CTTTAAAAGGGTTTGAATTCGTTAACTTCAG<br>TGACAACGTGAACCATcgactatttatattgtatg       |
| 4817         | GCS1_TetOff_For          | GTTCAATTCGATTTAATTCAACTCACAAACAAA<br>CGTATGTATACTTGTGATTGAGTTGTGACAA<br>AACTATTTGGCAGATGggaaacagctatgaccatg      |
| 4818         | GCS1_TetOff_Rev          | ATCCCATTGGTTCTAACATGATTATTACTTTT<br>TCGATTCATCCCACTTAAAGGTGTACCAATA<br>GATAAAAGACCCATcgactatttatattgtatg         |

**Appendix Table S5.** Oligonucleotides used in this study.
