# Supplementary material
Source: PubMed Central journal article supplement (PMC6769381)
Supplement: EMBJ-38-e101597-s002.pdf [file EMBJ-38-e101597-s002.pdf]

## Expanded View Figures

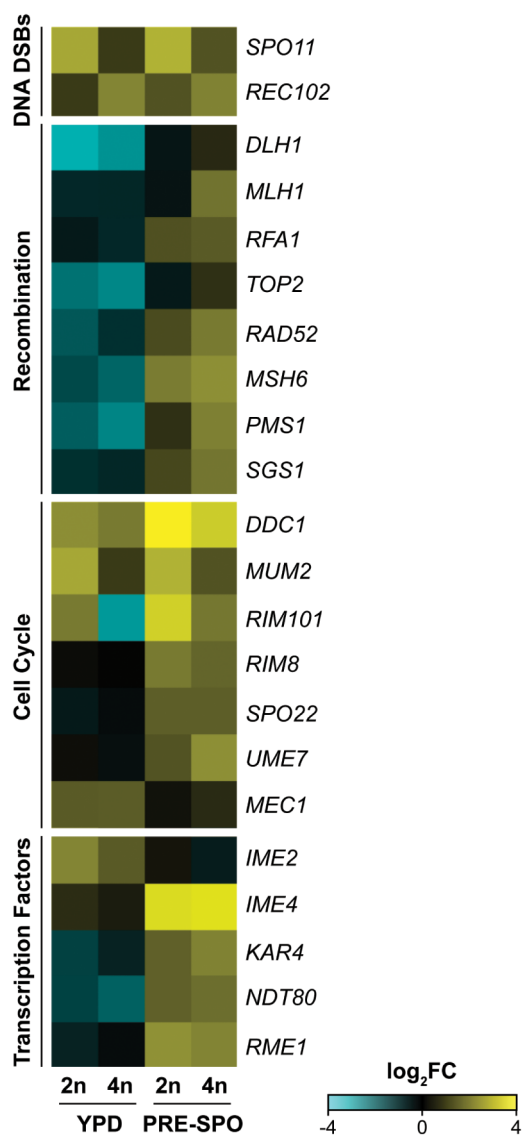

**Figure EV1. Transcriptional profiling of meiosis genes on YPD and PRE-SPO media.**

Heatmap of RNA-seq data for *C. albicans* homologs to “meiotic” genes in diploid and tetraploid cells on YPD and PRE-SPO media at 24 h, including programmed formation of DNA double-strand breaks (DSBs), recombination, coordination of the meiotic cell cycle, and transcription factors.

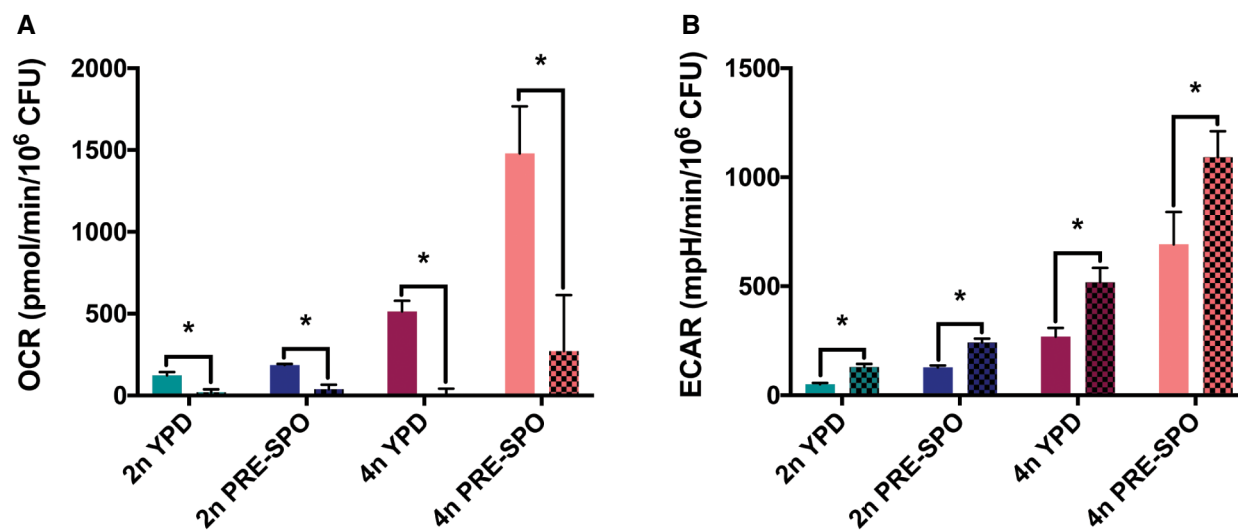

**Figure EV2. Oxygen consumption on PRE-SPO medium is inhibited by restricting mitochondrial respiration.**

- A Oxygen consumption rates (OCR) in diploid and tetraploid cells following growth for 24 h on YPD and PRE-SPO media at 30 and 37°C, respectively. OCR was compared before (bars with no pattern) and after (bars with checkered pattern) treatment with the electron transport chain (ETC) inhibitors antimycin A (5  $\mu$ M), rotenone (5  $\mu$ M), and the alternative oxidase inhibitor SHAM (500  $\mu$ M). (\*) denotes a significant difference between indicated experimental groups ( $P < 0.05$ , Student's  $t$ -test,  $n = 5$ , error bars represent SEM).
- B Extracellular acidification rates (ECAR) in diploid and tetraploid cells grown for 24 h on YPD and PRE-SPO media at 30 and 37°C, respectively, before (bars with no pattern) and after (bars with checkered pattern) treatment with the same ETC inhibitors as in (A). (\*) denotes a significant difference between the indicated groups ( $P < 0.05$ , Student's  $t$ -test,  $n = 5$ , error bars represent SEM).

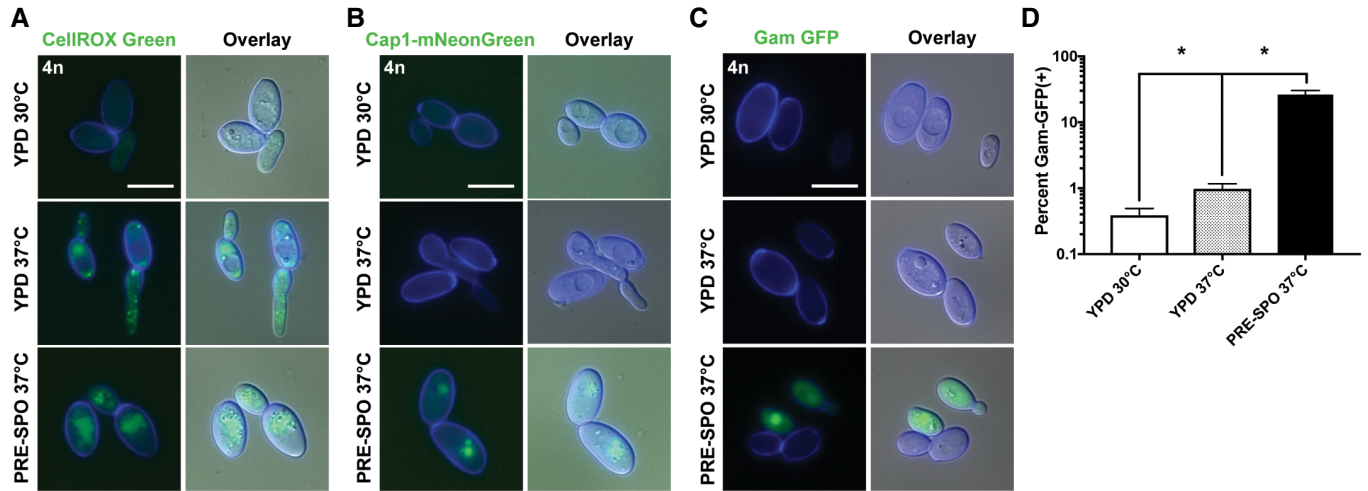

**Figure EV3. Tetraploid cell response to growth on YPD medium at 37°C.**

- A Tetraploid cells were grown on YPD medium at 30 or 37°C, or PRE-SPO medium at 37°C, for 24 h and stained with CellROX Green. Cell images indicate calcofluor white staining (cell wall; blue), GFP, and a merged image of GFP/DAPI/DIC channels. Scale bar = 10 μm.
- B Tetraploid cells containing a fluorescently labeled version of the Cap1 transcription factor (Cap1-mNeonGreen) were grown on YPD medium at 30 or 37°C, or PRE-SPO medium at 37°C, for 24 h. Cell images indicate calcofluor white staining (cell wall; blue), GFP, and a merged image of GFP/DAPI/DIC channels. Scale bar = 10 μm.
- C A diploid strain expressing a Tet-ON Gam-GFP reporter was cultured on YPD medium at 30 or 37°C, or PRE-SPO medium at 37°C, in the presence (Gam-GFP ON) of doxycycline for 24 h. Cell images indicate calcofluor white staining (cell wall; blue), GFP, and a merged image of GFP/DAPI/DIC channels. Scale bar = 10 μm.
- D Flow cytometric analysis of the tetraploid Gam-GFP reporter strain grown on YPD medium at 30 or 37°C, or PRE-SPO medium at 37°C in the presence of doxycycline for 24 h. (\*) denotes a significant difference between the indicated groups ( $P < 0.05$ , Student's  $t$ -test,  $n = 3$ , error bars represent SEM).

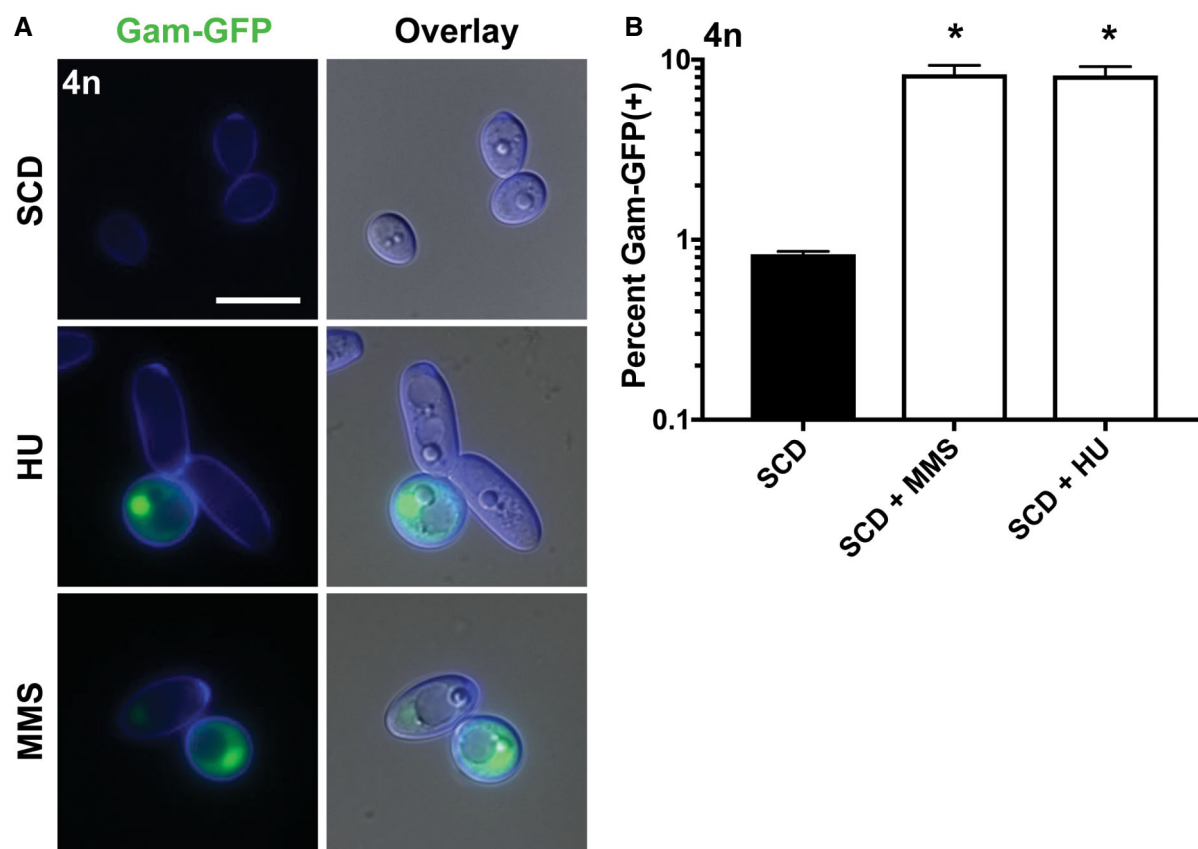

**Figure EV4. Quantification of Gam-GFP signal as a readout of DNA damage.**

- A Tetraploid cells expressing a Gam-GFP reporter were cultured on SCD medium (37°C for 24 h) with or without the DNA-damaging agents HU (20 mM) or MMS (0.01%) and analyzed via fluorescence microscopy. Cell images indicate calcofluor white staining (cell wall; blue), GFP, and a merged image of GFP/DAPI/DIC channels. Scale bar = 10  $\mu$ m.
- B Flow cytometric analysis of the tetraploid Gam-GFP reporter strain grown on SCD medium (37°C for 24 h) with or without HU (20 mM) or MMS (0.01%). (\*) denotes a significant difference between untreated SCD medium and that supplemented with the indicated agent ( $P < 0.05$ , Student's *t*-test,  $n = 3$ , error bars represent SEM).
